# Supplementary material for: Scalable synthesis of Li1.2Mn0.54Ni0.13Co0.13O2/LiNi0.5Mn1.5O4sphere composites as stable and high capacity cathodes for Li-ion batteries
Source: Royal Society of Chemistry journal article supplement (doi:10.1039/c5ra17804e), 2015-01-01
Supplement: c5ra17804e1.pdf [file c5ra17804e1.pdf]

## Supporting Information

### Scalable Synthesis of $\text{Li}_{1.2}\text{Mn}_{0.54}\text{Ni}_{0.13}\text{Co}_{0.13}\text{O}_2/\text{LiNi}_{0.5}\text{Mn}_{1.5}\text{O}_4$ Sphere Composites as Stable and High Capacity Cathode for Li-Ion Batteries

Huaqi Yin,<sup>a</sup> Shaomin Ji,<sup>\*a</sup> Mingzhe Gu,<sup>a</sup> Liguang Zhang,<sup>a</sup> and Jun Liu<sup>\*a,b</sup>

<sup>a</sup>Key Laboratory of Low Dimensional Materials & Application Technology, Ministry of Education, School of Materials Science and Engineering, Xiangtan University, Xiangtan 411105, China, email: [smji@xtu.edu.cn](mailto:smji@xtu.edu.cn)

<sup>b</sup>Key Laboratory of Advanced Energy Storage Materials of Guangdong Province, School of Materials Science and Engineering, South China University of Technology, Guangzhou 510641, China, email: [msjliu@scut.edu.cn](mailto:msjliu@scut.edu.cn) or [jliu@xtu.edu.cn](mailto:jliu@xtu.edu.cn)

**Table S1.** Lattice parameters of the pristine  $\text{Li}_{1.2}\text{Mn}_{0.54}\text{Ni}_{0.13}\text{Co}_{0.13}\text{O}_2$  microspheres and the coated  $\text{Li}_{1.2}\text{Mn}_{0.54}\text{Ni}_{0.13}\text{Co}_{0.13}\text{O}_2@ \text{LiNi}_{0.5}\text{Mn}_{1.5}\text{O}_4$  microspheres.

| Composition | a(Å)      | c(Å)       | c/a    | Vol(Å <sup>3</sup> ) | R <sub>wp</sub> | FWHM(003) |
|-------------|-----------|------------|--------|----------------------|-----------------|-----------|
| Pristine    | 2.8621(5) | 14.2229(5) | 4.9689 | 100.9(1)             | 9.2             | 0.201     |
| Coated      | 2.8537(7) | 14.2622(7) | 4.9976 | 100.5(9)             | 10.7            | 0.162     |

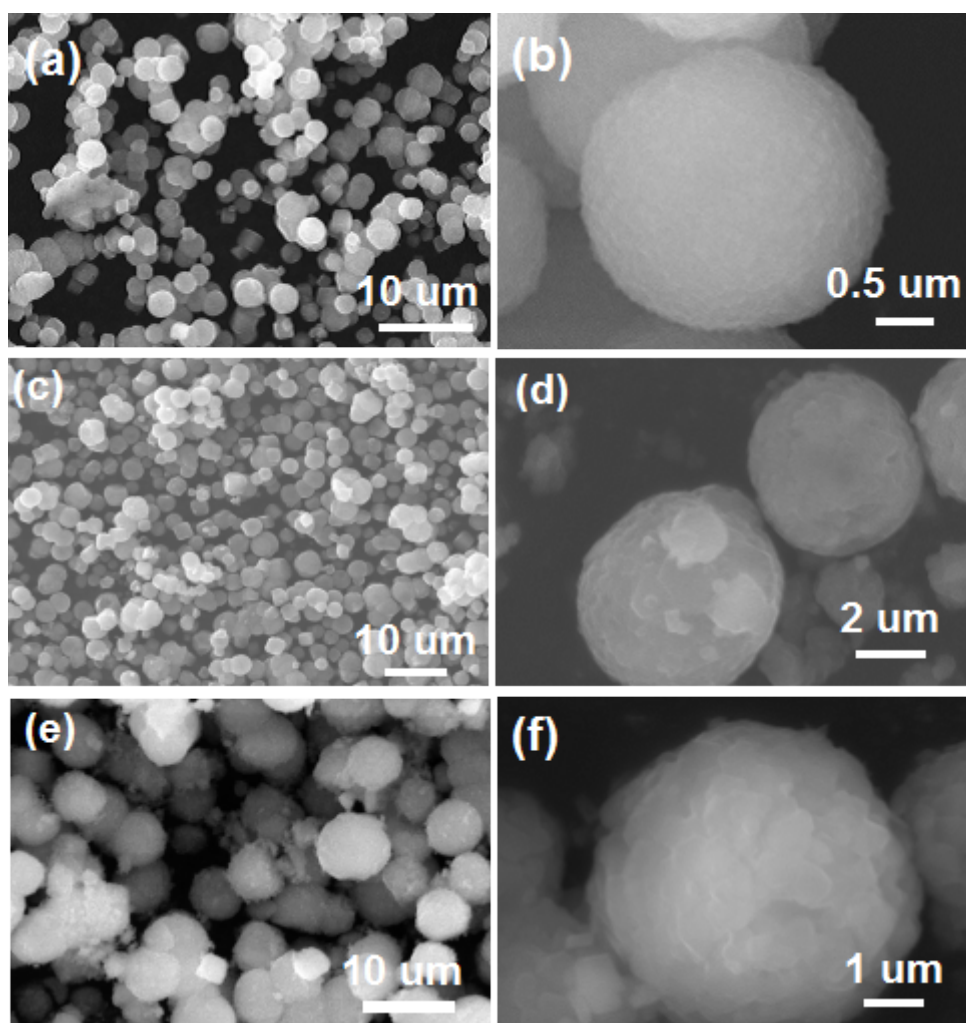

**Fig. 1** Low- (a,c,e) and high-magnification (b,d,f) SEM images of Mn<sub>0.54</sub>Ni<sub>0.13</sub>Co<sub>0.13</sub>(CO<sub>3</sub>)<sub>0.8</sub> precursor microspheres (a,b), uncoated Li-rich Li<sub>1.2</sub>Mn<sub>0.54</sub>Ni<sub>0.13</sub>Co<sub>0.13</sub>O<sub>2</sub> cathode microspheres (c,d), and coated Li-rich Li<sub>1.2</sub>Mn<sub>0.54</sub>Ni<sub>0.13</sub>Co<sub>0.13</sub>O<sub>2</sub>/LiMn<sub>1.5</sub>Ni<sub>0.5</sub>O<sub>4</sub> cathode microspheres (e,f).

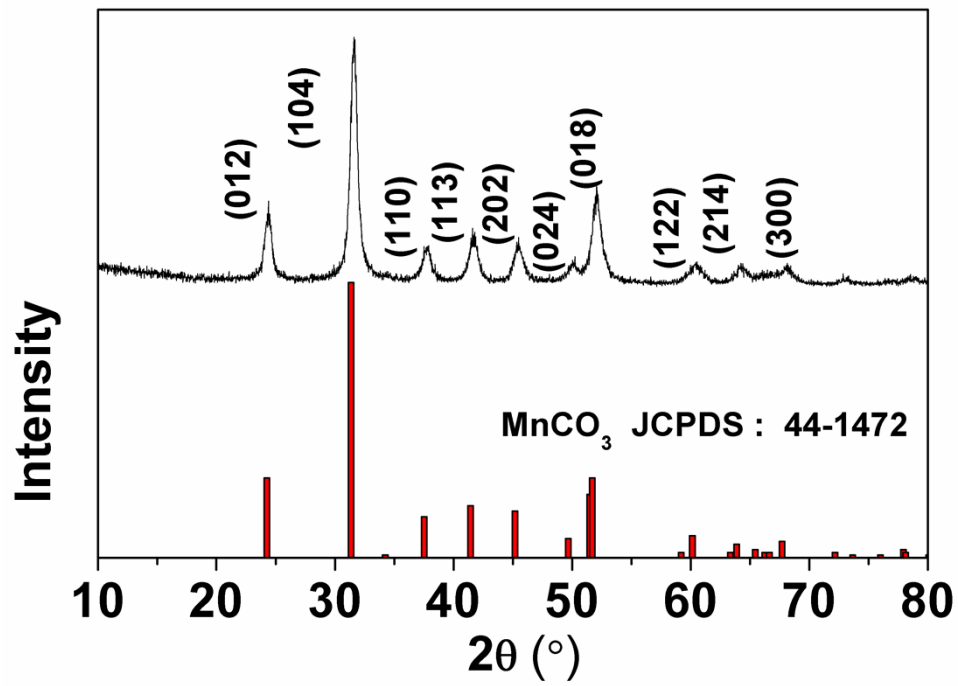

**Fig. 2** XRD patterns of the carbonate precursor of  $\text{Mn}_{0.54}\text{Co}_{0.13}\text{Ni}_{0.13}(\text{CO}_3)_{0.8}$ , which are well consistent with the  $\text{MnCO}_3$  standard PDF card (JCPDS: 44-1472).
